# Supplementary material
Source: PubMed Central journal article supplement (PMC3023820)
Supplement: NIHMS262880-supplement-01.pdf [file NIHMS262880-supplement-01.pdf]

**Supplemental Table 1: Statistical Analysis of GFP-Positive Cells from Collagen Gel Explant Assays**

| Figure Number    | AVC or Ventricle | Condition | Total Number of explants | Total Number of GFP+ cells | Number of Epithelial Cells (%) | Number of Activated Cells (%) | Number of Transformed Cells (%) |
|------------------|------------------|-----------|--------------------------|----------------------------|--------------------------------|-------------------------------|---------------------------------|
| <b>Figure 1B</b> | AVC              | GFP,      | 27                       | 1524                       | 821<br>(53±2.1%)               | 169<br>(11±0.4%)              | 534<br>(35±1.7%)                |
|                  | AVC              | Ephrin-A1 | 23                       | 602                        | 460<br>(76±3.0%)**             | 49<br>(8±1.6%)                | 93<br>(16±1.4%)**               |
| <b>Figure 1C</b> | Ventricle        | GFP       | 23                       | 534                        | 418<br>(79±3.2%)               | 59<br>(11±0.7%)               | 57<br>(10±2.5%)                 |
|                  | Ventricle        | WT EphA3  | 22                       | 473                        | 249<br>(52±3.6%)**             | 57<br>(12±1.0%)               | 167<br>(36±3.6%)**              |
|                  | Ventricle        | KD EphA3  | 26                       | 643                        | 512<br>(79±3.3%)               | 70<br>(11±1.8%)               | 61<br>(10±1.6)                  |
| <b>Figure 1D</b> | AVC              | GFP       | 26                       | 638                        | 326<br>(45±0.6%)               | 112<br>(15±1.7%)              | 200<br>(40±1.3%)                |
|                  | AVC              | WT EphA3  | 22                       | 675                        | 329<br>(48±2.7%)               | 97<br>(15±1.6%)               | 249<br>(37±2.5%)                |
|                  | AVC              | KD EphA3  | 26                       | 945                        | 617<br>(66±4.7%)*              | 141<br>(15±2.2%)              | 187<br>(19±2.7%)**              |

\* $p < 0.05$ , \*\* $p < 0.01$

## Supplemental Table2.

## Summary of M-mode echocardiography measurements for 8-week-old mice.

|                  | WT (n=8)  | KO (n=8)    |
|------------------|-----------|-------------|
| Heart Rate (bpm) | 703.75±23 | 573.75±104* |
| Arrhythmia       | 0/8       | 2/8         |
| IVSD (mm)        | 0.87±0.7  | 0.75±0.12   |
| LVIDD (mm)       | 3.07±0.26 | 3.11±0.32   |
| LVPWD (mm)       | 0.69±0.06 | 0.64±0.12   |
| IVSS (mm)        | 1.60±0.11 | 1.33±0.16** |
| LVIDS (mm)       | 1.50±0.12 | 1.87±0.3**  |
| LVPWS (mm)       | 0.96±0.11 | 0.8±0.09*   |
| FS (%)           | 51.2±1.6  | 41.4±4.1*   |
| EF (%)           | 88.2±1.1  | 78.3±03.2*  |

IVSD, interventricular septal thickness at end diastole; LVIDD, left ventricular internal dimension at end diastole; LVPWD left ventricular posterior wall thickness at end diastole; IVSS, interventricular septal thickness at end systole; LVIDS, left ventricular internal dimension at end-systole; LVPWS, left ventricular posterior wall thickness at end systole; FS, fractional shortening; EF, ejection fraction; WT, wild-type; KO, ephrin-A1 knockout animals. \*p<0.01; \*\*p<0.05.
